# Supplementary material for: Metal-catalyzed graphitic nanostructures as sorbents for vapor-phase ammonia
Source: Royal Society of Chemistry journal article supplement (doi:10.1039/c0jm03167d), 2011-01-01
Supplement: c0jm03167d.pdf [file c0jm03167d.pdf]

Supplementary Information for:

**METAL-CATALYZED GRAPHITIC NANOSTRUCTURES AS SORBENTS FOR  
VAPOR-PHASE AMMONIA**

Jeffrey W. Long,<sup>♦</sup> Matthew Laskoski,<sup>†</sup> Gregory W. Peterson,<sup>‡</sup> Teddy M. Keller,<sup>†</sup>  
Katherine A. Pettigrew,<sup>♦</sup> and Bryan J. Schindler<sup>†</sup>

<sup>♦</sup>Code 6170, Surface Chemistry Branch

<sup>†</sup> Code 6120, Materials Chemistry Branch

Naval Research Laboratory

Washington, DC 20375

<sup>‡</sup>U.S. Army Research, Development and Engineering Command

Edgewood Chemical Biological Center Research & Technology Directorate

CBR Filtration Team

Aberdeen Proving Ground, MD 21010

<sup>‡</sup>SAIC Gunpowder Branch, PO Box 68

Aberdeen Proving Ground, MD 21010

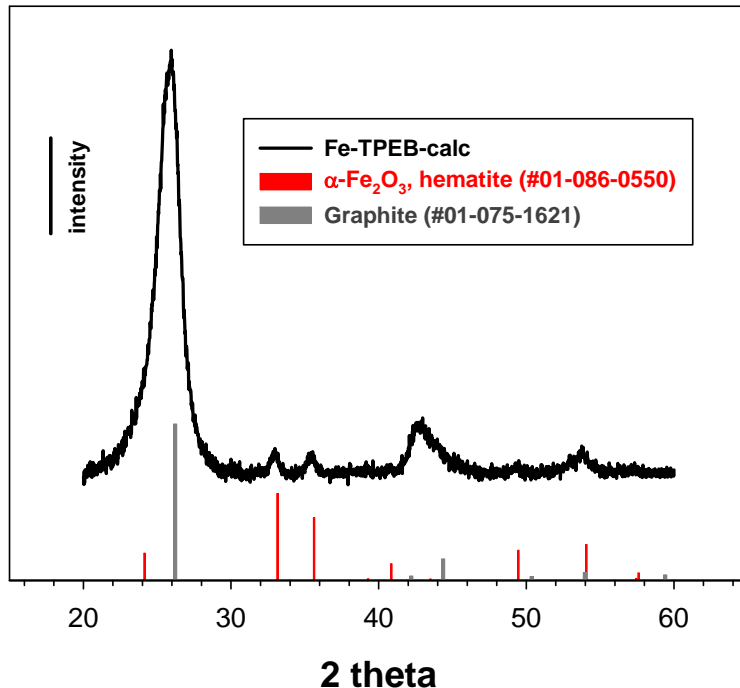

**Figure S1.** Powder X-ray diffraction for the Fe-TPEB-calc material, compared to standards for graphite and  $\alpha$ -Fe<sub>2</sub>O<sub>3</sub>.

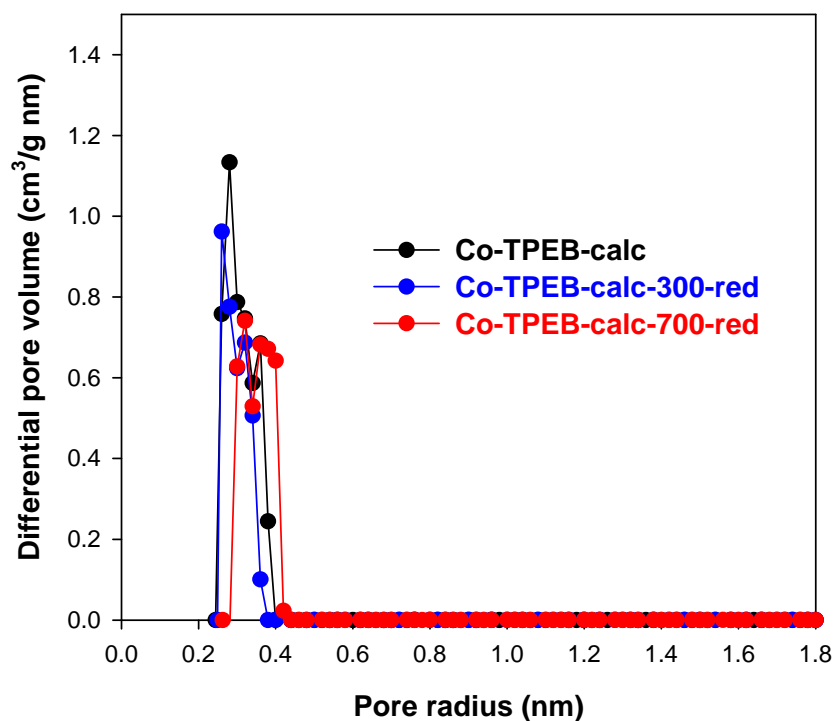

**Figure S2.** Pore-size distribution plots for Co-TPEB series, using the MP method for data fitting to model the micropore structure.

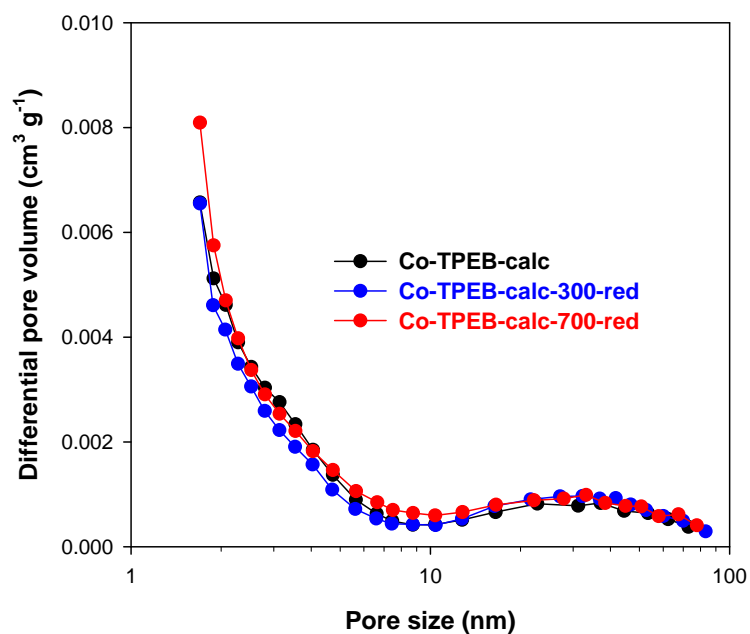

**Figure S3.** Pore-size distribution plots for Co-TPEB-based materials, derived from N<sub>2</sub>-sorption isotherms using a DFT fitting with a slit geometry.

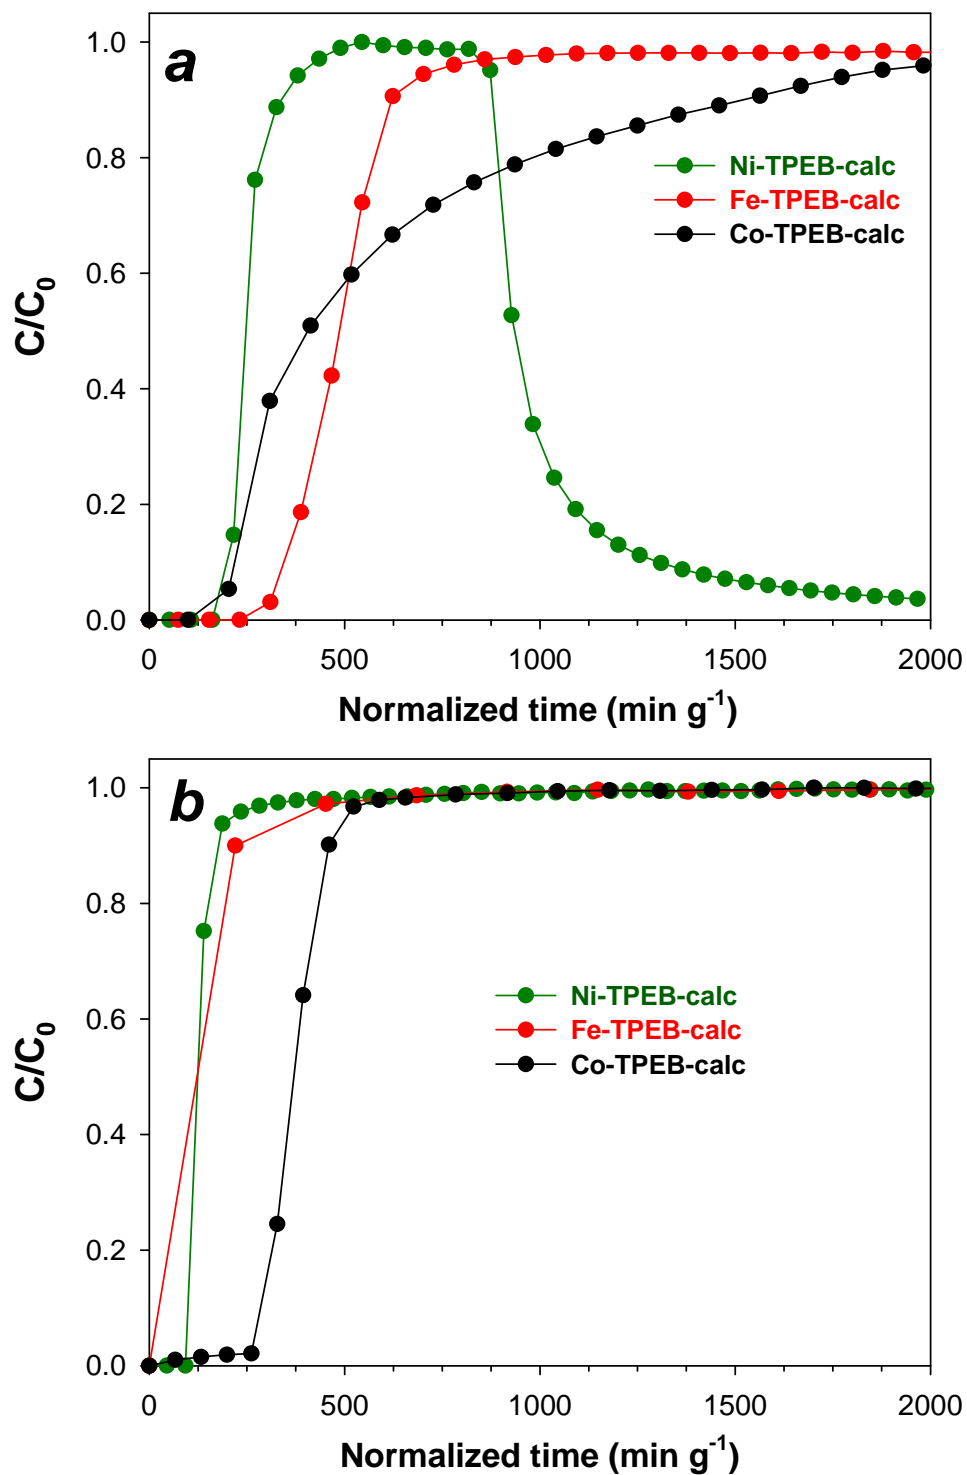

**Figure S4.** Expanded version of breakthrough curves presented in main manuscript Figure 3, showing the initial ammonia breakthrough.

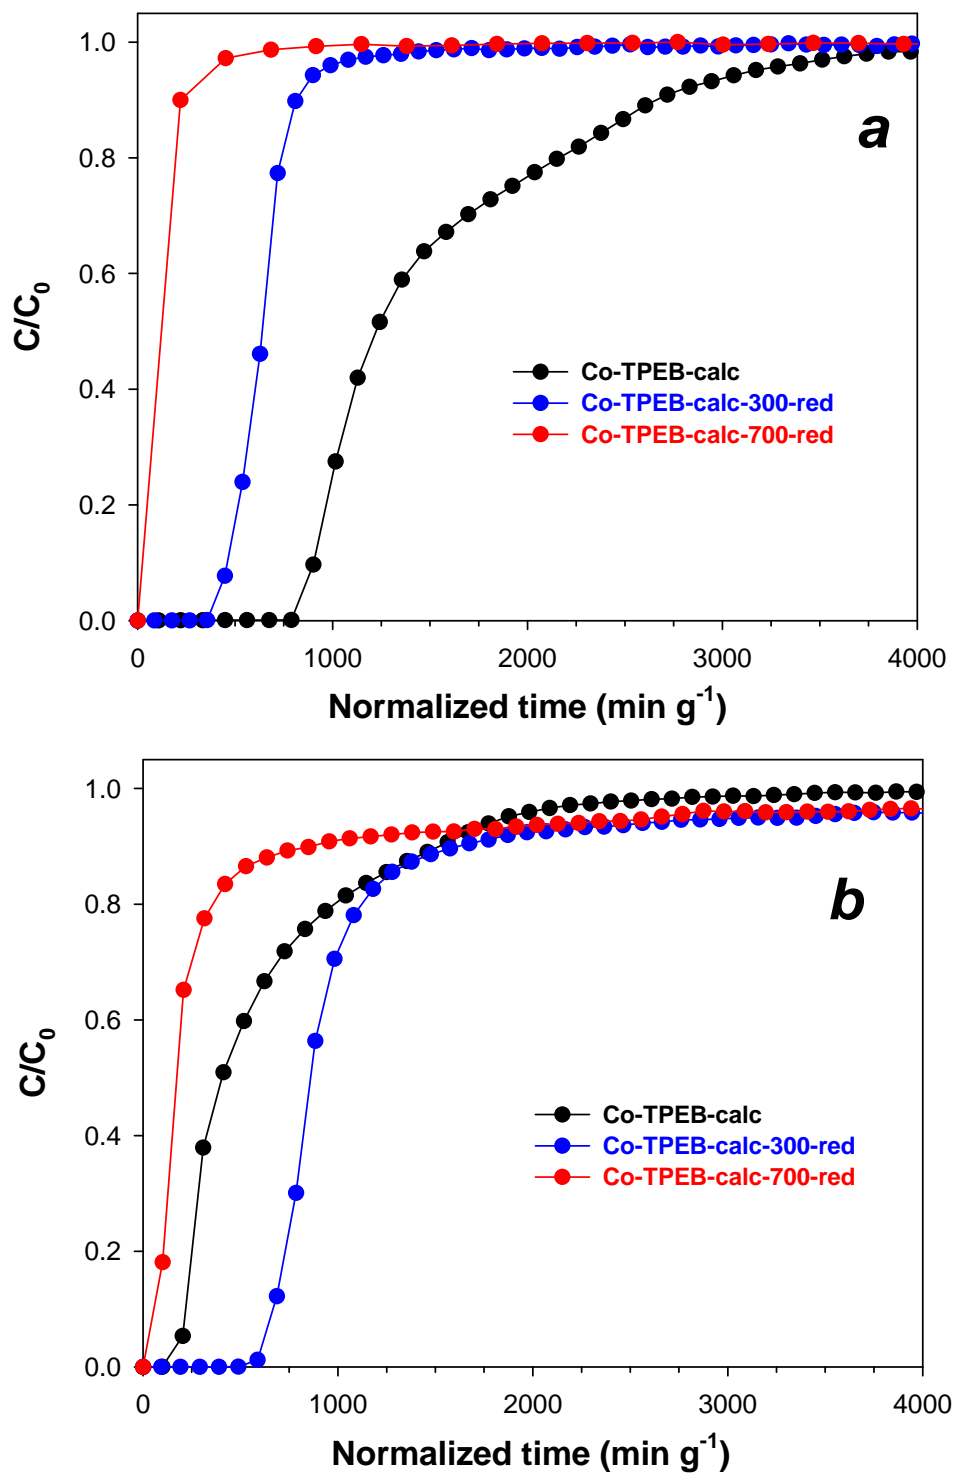

**Figure S5.** Expanded version of breakthrough curves presented in main manuscript Figure 8, showing the initial ammonia breakthrough.

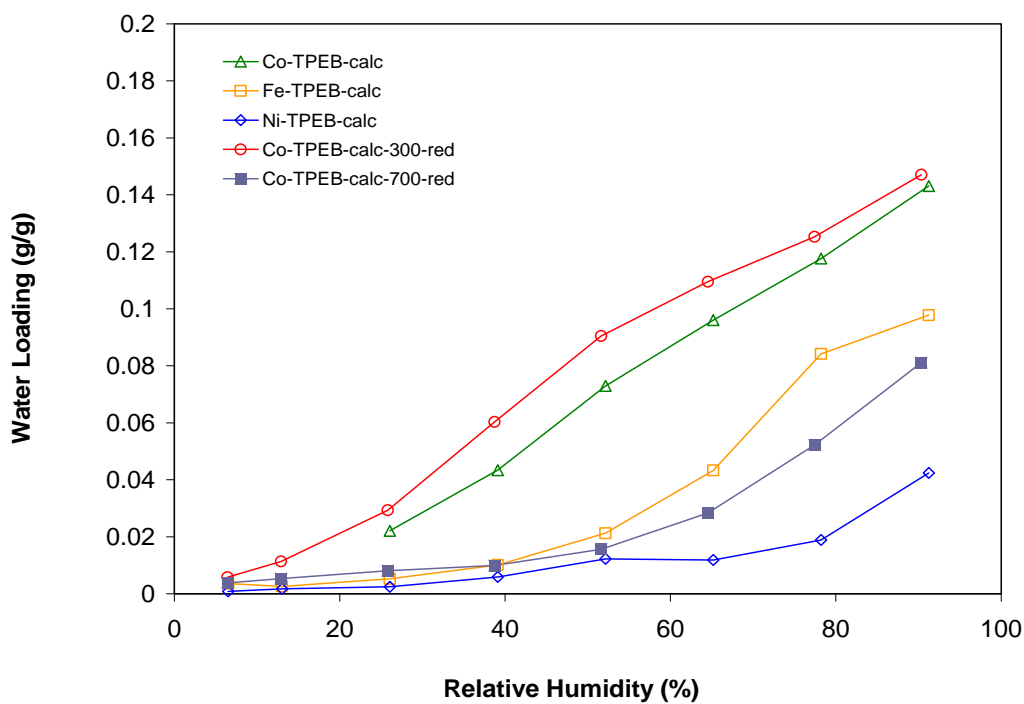

Figure S6. Water-sorption isotherms for TPEB-based materials.

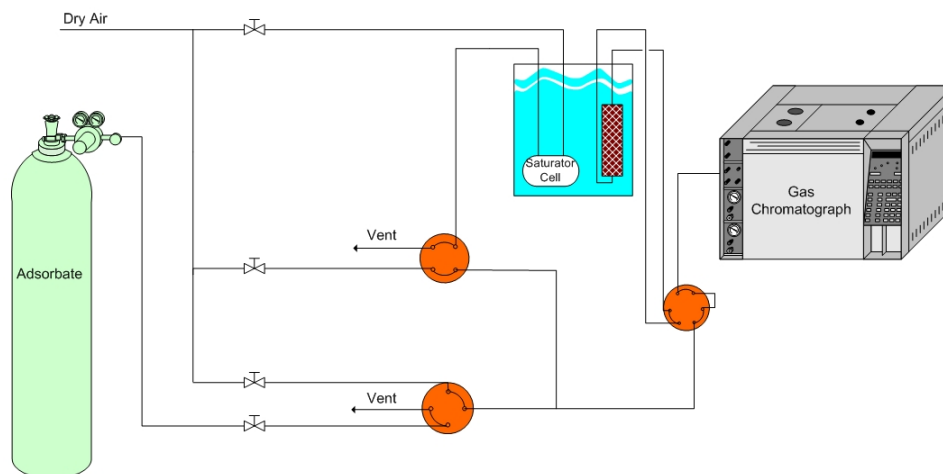

Figure S7. Schematic of micro-breakthrough testing apparatus.

**Table S1.** Microbreakthrough operating conditions for evaluation of NH<sub>3</sub>

| operating condition           | Value                         |
|-------------------------------|-------------------------------|
| temperature                   | 20°C                          |
| relative humidity             | -40°C (~0%) dew point and 80% |
| NH <sub>3</sub> concentration | 1,000 mg/m <sup>3</sup>       |
| adsorbent mass                | 5 – 25 mg                     |
| adsorbent volume              | 55 mm <sup>3</sup>            |
| flow rate                     | 20 mL/min                     |
| airflow velocity              | 2.7 cm/s                      |
| residence time                | 0.16 s                        |
